water, the Antarctic intermediate water and the Red Sea water. The bottom water is formed by mixing of true Antarctic bottom water with Atlantic deep water; the percentage amount of the latter increases with increasing distance from the bottom. The Antarctic intermediate water can, in the western basin, be traced from about latitude  $47^{\circ}$  S. up to the equator, but the depth of the salinity minimum rises towards the north. The Red Sea water is found below the intermediate water at stations north of Madagascar.

These features have previously been more or less recognized; the essential novelty in Thomsen's conclusions is that he finds no evidence of the existence of a south-going deep water current between 2000 m. and 3000 m., which according to earlier investigations should be analogous to the deep water current in the Atlantic Ocean. The question of this deep current is not yet quite settled. In a recent paper<sup>1)</sup> Clowes and Deacon have published a section from the eastern Indian Ocean, based upon "Discovery II" observation in 1935. They find traces of a rudimentary south-going deep current extending to at least  $35^{\circ}$  S. Their conception of the deep water circulation is a compromise between the views of Thomsen and Lotte Möller.

In the southwestern Pacific Thomsen points out four different water masses and deals especially with the bottom water. He shows that warm deep water of relatively high salinity enters the Pacific Ocean through the opening to the south of New Zealand, and this deep water must come from the Atlantic Ocean, as previously assumed by the present reviewer. Thomsen considers the deep water in the southwestern Pacific as composed of three types of water: Antarctic bottom water, Atlantic deep water, and Antarctic intermediate water. He shows that the percentage amount of these three types varies systematically with depth and locality.

H. U. S.

**V. Cornish.** "Ocean Waves and Kindred Geophysical Phenomena." With additional notes by H. Jeffreys. Camb. Univ. Press, Cambridge, 1934.

Dr. Cornish ist seit langem durch zahlreiche Aufsätze in Fachzeitschriften und vor allem durch sein früheres Werk "Waves of the Sea and other Water Waves" (London, 1912) als Wellenforscher bekannt. In diesem neuen handlichen Buch gibt er Ausschnitte aus seinen in fast vierzigjähriger Liebhaberarbeit gesammelten Beobachtungen zum Thema "Wellen", die dann grösstenteils in den "Additional Notes" durch H. Jeffreys mathematisch-physikalisch erörtert werden. In diesem Anhang, der etwa ein Viertel des Buches umfasst, liegt der wesentliche Unterschied gegenüber den "Waves of the Sea" und eine Ergänzung, auf die der Verfasser selbst, wie er im Vorwort ausführt, seit Jahrzehnten gewartet hat. Die Gruppierung des Stoffes ist im grossen die gleiche wie in dem älteren Buch (Ozeanwellen im Verhältnis zum Wind — Sand- und Schneewellen — Borenartige Erscheinungen in Flüssen); vor allem im zweiten Teil werden neue Beobachtungsergebnisse über Sandwellen (durch Wind wie durch Wasser erzeugte) und Schneewellen; dazu auch eigene Experimente des Verfassers mitgeteilt. Ein besonderer Vorzug des Buches für jeden, der sich Anleitung für eigene Beobachtungen holen will, ist die liebevolle Ausführlichkeit, mit der Dr. Cornish seine Beobachtungsmethoden, die

<sup>1)</sup> *Nature*, Vol. 136 p. 936—938, 1935.

sich immer der einfachsten Hilfsmittel bedienen, an Einzelfällen erläutert. So etwa im ersten Abschnitt, der den Leserkreis dieser Zeitschrift am meisten interessiert, die Auseinandersetzung über Täuschungen beim Schätzen grosser Wellenlängen (die infolge der Schwierigkeit, den Vorübergang des wirklichen Kammes zu erfassen, meistens unterschätzt werden). Besonderes Interesse werden auch die kritischen Mitteilungen über eigene und fremde Schätzungen grösster Wellendimensionen finden, unter denen Angaben über Höhen von reichlich 20 m. (Nördlicher Stiller Ozean) und von rund 25 m. aus dem Nordatlantischen Ozean für glaubwürdig befunden werden. (Diese letzte Angabe geht auf Schätzungen an Bord des Riesendampfers "Majestic" zurück, vgl. *The Marine Observer*, 1934, S. 105/08). Als besonderes Kennzeichen der Sturmwellen der zirkumantarktischen zusammenhängenden Weltmeerflächen (des "Southern Ocean" der Engländer) wird grosse Wellenlänge und — quer dazu — grosse Kammlänge, weniger aussergewöhnliche Wellenhöhe, hervorgehoben. Die Überschlagsrechnungen zu den Beobachtungen über Wind, Seeraum und Seegang werden manchen Leser vielleicht doch leise an eine Diskussionsbemerkung von G. Simpson zu ähnlichen Ausführungen des Verfassers erinnern, dass die gefundene Übereinstimmung zwischen Wind- und Wellengeschwindigkeit "zu gut erscheine, um wahr zu sein" (*Quart. Journ. R. Met. Society*, 1926, S. 127).

Das Buch ist durch eine grössere Anzahl ganzseitiger Abbildungen nach Aufnahmen des Verfassers geschmückt. Es stellt als Gemeinschaftsarbeit eines unermüdeten Meisters der Beobachtung und eines Geophysikers eine dankenswerte Bereicherung der Literatur über Wellen dar.

*A. Schumacher.*

**C M. Maldura.** "Su l'unificazione dei metodi di analisi dei sali nutritivi e della silice in soluzione nell'acqua di mare." *Boll. Pesca, Piscicol. e Idrobiol.* Anno XI, Fasc. 3. Roma, 1935.

La Commission Internationale pour l'Exploration de la Méditerranée has proposed to study the biological stock of the Mediterranean in relation to the quantity of nitrates and phosphates in solution. Since the analyses of phosphates and nitrates made by Helge Thomsen on board the "Dana" showed that the Mediterranean is very poor in these salts, analytical methods may need to be even more sensitive than those we use in our northern waters. Maldura has therefore surveyed the literature and concludes that in general the existing methods are likely to suffice for such a study. While this may be so the small amounts present particularly in the eastern basin are likely to tax the skill of the analyst if a clear picture is to be obtained of the variations with place, depth, and season. Since the International Council for the Exploration of the Sea already has a Subcommittee charged with the task of preparing a report on this same subject, this seems a field where the two International Councils could collaborate to their mutual advantage. The greater transparency of the water and the greater intensity of the sunlight which enters the Mediterranean at an angle more nearly vertical than in our more northern waters suggest that chemical analyses made in conjunction with measurements of light penetration and of the vertical distribution of plankton organisms should prove of much value.

*L. H. N. C.*
